# Supplementary material for: Modulation of EZH2 Activity Induces an Antitumoral Effect and Cell Redifferentiation in Anaplastic Thyroid Cancer
Source: MDPI journal article supplement (doi:10.3390/ijms24097872), 2023-04-26
Supplement: s1 [file s1]

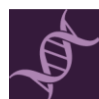

## Supplementary Material

**Table S1.** Validation of CRISPR/Cas9-mediated *EZH2* gene editing with sgRNA18 in SW1736-CIA using the SeqScreener Gene App

| Frequency | DNA Sequence                                                                       | Indel Size |
|-----------|------------------------------------------------------------------------------------|------------|
| 11.91%    | GAAGCGTGTAATAATCAGAGTACATG-----   ---AGGTTTCAGACGAGCTGATGAAGTAAAGG                 | -18        |
| 7.28%     | GAAGCGTGTAATAATCAGAGTACATGCGACTGAG-----   -----GCTGATGAAGTAAAGG                    | -22        |
| 7.18%     | GAAGCGTGTAATAATCAGAGTACATG-----   --GAGGTTTCAGACGAGCTGATGAAGTAAAGG                 | -17        |
| 6.54%     | GAAGCGTGTAATAATCAGAGTACATGCGACTGAGACAGCTC   +AAGAGGTTTCAGACGAGCTGATGAAGTAAAG       | 1          |
| 5.89%     | GAAGCGTGTAATAATCAGAGTACATGCGACTGAGACAGCT-   AAGAGGTTTCAGACGAGCTGATGAAGTAAAGG       | -1         |
| 5.28%     | GAAGCGTGTAATAATCAGAGTACATGCGACTGAGACA----   -----GCTGATGAAGTAAAGG                  | -19        |
| 4.21%     | GAAGCGTGTAATAATCAGAGTACATGCGACTGAGACAGCT-   -----GCTGATGAAGTAAAGG                  | -16        |
| 4.08%     | GAAGCGTGTAATAATCAGAGTACATGCGACTGAGACAGCTC   ++++++AAGAGGTTTCAGACGAGCTGATGAAGTAAAGG | 19         |
| 4.01%     | GAAGCGTGTAATAATCAGAGTACATG-----   -----AGACGAGCTGATGAAGTAAAGG                      | -24        |
| 3.92%     | GAAGCGTGTAATAATCAGAGTACATGCGACTGAGACAGCTC   ++++++AAGAGGTTTCAGACGAGCTGATGAAGTAAAGG | 13         |
| 3.31%     | GAAGCGTGTAATAATCAGAGTACATG-----   -----CGAGCTGATGAAGTAAAGG                         | -27        |
| 2.94%     | GAAGCGTGTAATAATCAGAGTACATGCGACTGAGACAGCTC   ---AGGTTTCAGACGAGCTGATGAAGTAAAGG       | -3         |
| 2.93%     | GAAGCGTGTAATAATCAGAGTACATGCGACTGAGACAGCT-   -AAGAGGTTTCAGACGAGCTGATGAAGTAAAGG      | -2         |
| 2.58%     | GAAGCGTGTAATAATCAGAGTACATGCGACTGAGACAGCTC   AAGAGGTTTCAGACGAGCTGATGAAGTAAAGG       | 0          |
| 2.40%     | GAAGCGTGTAATAATCAGAGTACATGCGACTGAGAC-----   -----TTCAGACGAGCTGATGAAGTAAAGG         | -11        |
| 2.13%     | GAAGCGTGTAATAATCAGAGTACATGCGACTGAGACAGCTC   ++++++AAGAGGTTTCAGACGAGCTGATGAAGTAAAGG | 16         |
| 2.00%     | GAAGCGTGTAATAATCAGAGTACATGCGACTGAG-----   -----AGCTGATGAAGTAAAGG                   | -21        |
| 1.79%     | GAAGCGTGTAATAATCAGAGTACATGCGACTGAGACAGCTC   ++++++AAGAGGTTTCAGACGAGCTGATGAAGTAAAGG | 9          |
| 1.66%     | GAAGCGTGTAATAATCAGAGTACATG-----   -----CAGACGAGCTGATGAAGTAAAGG                     | -23        |
| 1.56%     | GAAGCGTGTAATAATCAGAGTACATGCGACTGAGACAGCTC   ++++++AAGAGGTTTCAGACGAGCTGATGAAGTAAAGG | 6          |
| 1.56%     | GAAGCGTGTAATAATCAGAGTACATGCGACTGAGAC-----   -----CGAGCTGATGAAGTAAAGG               | -17        |
| 1.49%     | GAAGCGTGTAATAATCAGAGTACATGCGACTGAGACAGCTC   ++++++AAGAGGTTTCAGACGAGCTGATGAAGTAAAGG | 17         |
| 1.22%     | GAAGCGTGTAATAATCAGAGTACATGCGACTGAGACAGCTC   -----GAGCTGATGAAGTAAAGG                | -13        |
| 1.16%     | GAAGCGTGTAATAATCAGAGTACATG-----   -----TTCAGACGAGCTGATGAAGTAAAGG                   | -21        |
| 1.14%     | GAAGCGTGTAATAATCAGAGTACATGCGACTGAGACAGCTC   +++AAGAGGTTTCAGACGAGCTGATGAAGTAAAGG    | 3          |
| 1.10%     | GAAGCGTGTAATAATCAGAGTACATG-----   -----ACGAGCTGATGAAGTAAAGG                        | -26        |
| 1.02%     | GAAGCGTGTAATAATCAGAGTACATGCGACTGAGACAGCTC   ++++++AAGAGGTTTCAGACGAGCTGATGAAGTAAAGG | 15         |
| 1.00%     | GAAGCGTGTAATAATCAGAGTACATG-----   -----GACGAGCTGATGAAGTAAAGG                       | -25        |
| 0.89%     | GAAGCGTGTAATAATCAGAGTACATGCGACTGAGACAGCT-   --GAGGTTTCAGACGAGCTGATGAAGTAAAGG       | -3         |
| 0.87%     | GAAGCGTGTAATAATCAGAGTACATG-----   -----AGCTGATGAAGTAAAGG                           | -29        |
| 0.84%     | GAAGCGTGTAATAATCAGAGTACATGCGACTGAGACAGCTC   ++++++AAGAGGTTTCAGACGAGCTGATGAAGTAAAGG | 7          |
| 0.83%     | GAAGCGTGTAATAATCAGAGTACATGCGACTGAGACAGCTC   ++AAGAGGTTTCAGACGAGCTGATGAAGTAAAGG     | 2          |
| 0.79%     | GAAGCGTGTAATAATCAGAGTACATGCGACTGAGACAGCTC   ++++++AAGAGGTTTCAGACGAGCTGATGAAGTAAAGG | 10         |
| 0.77%     | GAAGCGTGTAATAATCAGAGTACATG-----   AAGAGGTTTCAGACGAGCTGATGAAGTAAAGG                 | -15        |
| 0.69%     | GAAGCGTGTAATAATCAGAGTACATGCGACTGAGACAGCTC   ++++++AAGAGGTTTCAGACGAGCTGATGAAGTAAAGG | 20         |
| 0.52%     | GAAGCGTGTAATAATCAGAGTACATGCGACTGAGAC-----   -----TCAGACGAGCTGATGAAGTAAAGG          | -12        |
| 0.51%     | GAAGCGTGTAATAATCAGAGTACATGCGACTGAGACAGCTC   ++++++AAGAGGTTTCAGACGAGCTGATGAAGTAAAGG | 12         |

**Table S2.** Validation of CRISPR/Cas9-mediated *EZH2* gene editing with sgRNA18 in SW1736-CIC using the SeqScreener Gene App

| Frequency | DNA Sequence                                                                 | Indel Size |
|-----------|------------------------------------------------------------------------------|------------|
| 30.39%    | GAAGCGTGTAATAATCAGAGTACATGCGACTGAG-----   --GAGGTTTCAGACGAGCTGATGAAGTAAAGG   | -9         |
| 20.26%    | GAAGCGTGTAATAATCAGAGTACATGCGACTGAG-----   ----GGTTCAGACGAGCTGATGAAGTAAAGG    | -11        |
| 13.28%    | GAAGCGTGTAATAATCAGAGTACATGCGACTGAG-----   -----TTCAGACGAGCTGATGAAGTAAAGG     | -13        |
| 13.25%    | GAAGCGTGTAATAATCAGAGTACATGCGACTGAGACAGCT-   AAGAGGTTTCAGACGAGCTGATGAAGTAAAGG | -1         |
| 10.24%    | GAAGCGTGTAATAATCAGAGTACATGCGACTGAG-----   ----GTTTCAGACGAGCTGATGAAGTAAAGG    | -12        |
| 7.29%     | GAAGCGTGTAATAATCAGAGTACATGCGACTGAGA-----   ----GGTTCAGACGAGCTGATGAAGTAAAGG   | -10        |
| 2.26%     | GAAGCGTGTAATAATCAGAGTACATGCGACTGAGACA----   AAGAGGTTTCAGACGAGCTGATGAAGTAAAGG | -4         |
| 1.67%     | GAAGCGTGTAATAATCAGAGTACATGCGACTGAG-----   AAGAGGTTTCAGACGAGCTGATGAAGTAAAGG   | -7         |
| 1.36%     | GAAGCGTGTAATAATCAGAGTACATGCGACTGAGACAGCTC   AAGAGGTTTCAGACGAGCTGATGAAGTAAAGG | 0          |

**Table S3.** Validation of CRISPR/Cas9-mediated *EZH2* gene editing with sgRNA18 in SW1736-CIE using the SeqScreener Gene App

| Frequency | DNA Sequence                                                                 | Indel Size |
|-----------|------------------------------------------------------------------------------|------------|
| 17.22%    | GAAGCGTGTAATAATCAGAGTACATGCGACTGAG-----   -----TCAGACGAGCTGATGAAGTAAAGG      | -14        |
| 14.76%    | GAAGCGTGTAATAATCAGAGTACATGCGACTGAGA-----   ----GGTTCAGACGAGCTGATGAAGTAAAGG   | -10        |
| 14.12%    | GAAGCGTGTAATAATCAGAGTACATGCGACTGAGACA----   AAGAGGTTTCAGACGAGCTGATGAAGTAAAGG | -4         |
| 14.04%    | GAAGCGTGTAATAATCAGAGTACATGCGACTGAG-----   AAGAGGTTTCAGACGAGCTGATGAAGTAAAGG   | -7         |
| 10.46%    | GAAGCGTGTAATAATCAGAGTACATGCGACTGAGACA----   -AGAGGTTTCAGACGAGCTGATGAAGTAAAGG | -5         |
| 8.83%     | GAAGCGTGTAATAATCAGAGTACATGCGACTGAGACAGCTC   AAGAGGTTTCAGACGAGCTGATGAAGTAAAGG | 0          |
| 8.67%     | GAAGCGTGTAATAATCAGAGTACATGCGACTGAG-----   -----TTCAGACGAGCTGATGAAGTAAAGG     | -13        |
| 3.97%     | GAAGCGTGTAATAATCAGAGTACATGCGACTGAGAC-----   --GAGGTTTCAGACGAGCTGATGAAGTAAAGG | -7         |
| 3.91%     | GAAGCGTGTAATAATCAGAGTACATGCGACTGAG-----   ----GGTTCAGACGAGCTGATGAAGTAAAGG    | -11        |
| 2.48%     | GAAGCGTGTAATAATCAGAGTACATGCGACTGAG-----   -AGAGGTTTCAGACGAGCTGATGAAGTAAAGG   | -8         |
| 1.55%     | GAAGCGTGTAATAATCAGAGTACATGCGACTGAG-----   --GAGGTTTCAGACGAGCTGATGAAGTAAAGG   | -9         |

**Table S4.** List of potential off-target genes of SgRNA18

| Genomic localization | N° of mismatches | Gene symbol      | Observation | Sequence (including mismatches)                    |
|----------------------|------------------|------------------|-------------|----------------------------------------------------|
| chr20:1180923        | 3                | <i>TMEM74B</i>   | Exonic      | CCC <b>a</b> TTGAGCTGTCTCA <b>tg</b> CGCA          |
| chr4:188610246       | 3                | <i>LINC01060</i> | Intergenic  | CCTCTTGAG <b>a</b> T <b>Ga</b> CTCAGTC <b>t</b> CA |
| chr7:1979269         | 3                | <i>MAD1L1</i>    | Intronic    | CCCCT <b>g</b> GAGCTGTCTCAGTCC <b>cCc</b>          |
| chr8:120083190       | 3                | <i>COL14A1</i>   | Intergenic  | CCTCTT <b>tg</b> GCTGTCTCAGTC <b>t</b> CA          |

**Table S5.** Thyroid cancer cell lines and culture conditions

| Histology | Cell line | Genetic driver        | Culture medium*    |
|-----------|-----------|-----------------------|--------------------|
| PTC       | BCPAP     | BRAF <sup>V600E</sup> | DMEM + 10% FBS     |
|           | KTC2      | BRAF <sup>V600E</sup> | RPMI1640 + 5% FBS  |
| ATC       | SW1736    | BRAF <sup>V600E</sup> | RPMI1640 + 10% FBS |
|           | 8305C     | BRAF <sup>V600E</sup> | RPMI1640 + 10% FBS |

\* FBS – Fetal bovine serum.

**Table S6.** List of primers used in this study

|             | Sequence 5'-3' *                 | Experiment                        |
|-------------|----------------------------------|-----------------------------------|
| sgRNA 7 Fw  | <b>CACCGACACGCTTCCGCCAACAAAC</b> | cloning in PX459 plasmid          |
| sgRNA 7 Rv  | <b>AAACGTTTGTGTCGGAAGCGTGTC</b>  | cloning in PX459 plasmid          |
| sgRNA 18 Fw | <b>CACCGTGCGACTGAGACAGCTCAAG</b> | cloning in PX459 plasmid          |
| sgRNA 18 Rv | <b>AAACCTTGAGCTGTCTCAGTCGCAC</b> | cloning in PX459 plasmid          |
| sgRNA 25 Fw | <b>CACCGCAGACGAGCTGATGAAGTAA</b> | cloning in PX459 plasmid          |
| sgRNA 25 Rv | <b>AAACTTACTTCATCAGCTCGTCTGC</b> | cloning in PX459 plasmid          |
| EZH2 FW     | ATTAAACCATGCAGCACAAATG           | DNA sequencing of target region   |
| EZH2 RV     | CAGATCAAGAACCTAAGCTTCCA          | DNA sequencing of target region   |
| TMEM74B Fw  | TCGAGTCAATCCGGACACAGT            | sg18 off-targeting DNA sequencing |
| TMEM74B Rv  | GAGCTCAGTTTAAAACCCCAGG           | sg18 off-targeting DNA sequencing |
| RPL19 FW    | TCTCATGGAACACATCCACAA            | qPCR                              |
| RPL19 RV    | TGGTCAGCCAGGAGCTTCTT             | qPCR                              |
| CDH1 FW     | TACCCTGGTGGTTCAAGCTG             | qPCR                              |
| CDH1 RV     | ACCTGACCCTTGACGTGGT              | qPCR                              |
| ZEB1 FW     | GATGACCTGCCAACAGACCA             | qPCR                              |
| ZEB1 RV     | GCCCTTCCTTTCCTGTGTCA             | qPCR                              |
| ZEB2 FW     | AGTGTGCCCAACCATGAGTC             | qPCR                              |
| ZEB2 RV     | TCCTTCATTTCTTCTGGACCATC          | qPCR                              |
| NIS FW      | AGTACATTGTAAGCCACGATGCTGTA       | qPCR                              |
| NIS RV      | CGGTCACCTGGTTCAGGATGA            | qPCR                              |
| TG FW       | CCTGCTGGCTCCACCTTGTTT            | qPCR                              |
| TG RV       | CCTTGTTCTGAGCCTCCCATCGTT         | qPCR                              |
| TPO FW      | ACGCCTCTGCGAGGTGC                | qPCR                              |
| TPO RV      | TGCAAATCACCGTCGAGGT              | qPCR                              |
| TSHR FW     | CCTTCACCTCACACGGGCT              | qPCR                              |
| TSHR RV     | TGCTCTCATTACACATCAAGGACTC        | qPCR                              |
| NKX2-1 FW   | CAGCCTGTCCCACCTGAACT             | qPCR                              |
| NKX2-1 RV   | ATAGCAAGGTGGAGCAGGACAT           | qPCR                              |
| PAX8 FW     | GGCATGGTGGCAGGAAGT               | qPCR                              |
| PAX8 RV     | GCGCCAGGCCTCGCTGTAGGA            | qPCR                              |
| FOXE1 FW    | TGAGCCAGCGTAGGGACGAAAA           | qPCR                              |
| FOXE1 RV    | CCACCTCCTCCCGTTTACAGAGTA         | qPCR                              |
| GLIS3 FW    | AACGCCCCGCTATAAACTGCT            | qPCR                              |
| GLIS3 RV    | CTCGCAACCTTCAAACGTACA            | qPCR                              |
| EED FW      | TGGATTCTGGCAAAAGATGCT            | qPCR                              |
| EED RV      | TATCGAAGTCGATCCCAGCG             | qPCR                              |
| SUZ12 FW    | GAAGCCGAAAATGGAGCACG             | qPCR                              |
| SUZ12 RV    | GTTCTGGAGTTTCGATGAGACAT          | qPCR                              |
| EZH2 FW     | TACTTGTGGAGCCGCTGAC              | qPCR                              |
| EZH2 RV     | CTGCCACGTCAGATGGTG               | qPCR                              |

\* FW – forward, RV – reverse

**Table S7.** List of antibodies and dilutions for protein expression analysis

| <b>Antibody</b>                 | <b>Source</b>  | <b>Dilution</b> | <b>Application*</b> |
|---------------------------------|----------------|-----------------|---------------------|
| mouse anti-E-Cadherin           | Cell signaling | 1:1000          | WB                  |
| mouse anti-N-Cadherin           | Sigma          | 1:500           | WB                  |
| rabbit anti-b-Catenin (sc-7199) | Santa Cruz     | 1:1000          | WB                  |
| rabbit anti-c-Myc (sc-764)      | Santa Cruz     | 1:1000          | WB                  |
| rabbit anti-Cyclin D1           | Cell signaling | 1:1000          | WB                  |
| rabbit anti-EED                 | Cell signaling | 1:1000          | WB                  |
| rabbit anti-EZH2                | Cell signaling | 1:1000          | WB                  |
| rabbit anti-H3                  | Cell signaling | 1:2000          | WB                  |
| rabbit anti-H3K27me3            | Cell signaling | 1:1000          | WB                  |
| rabbit anti-Ki67                | Sigma          | 1:100           | IHC                 |
| rabbit anti- $\alpha$ SMA       | Sigma          | 1:100           | IHC                 |
| rabbit anti-ZEB1                | Invitrogen     | 1:1000          | WB                  |

\* WB – western blot, IHC – immunohistochemistry

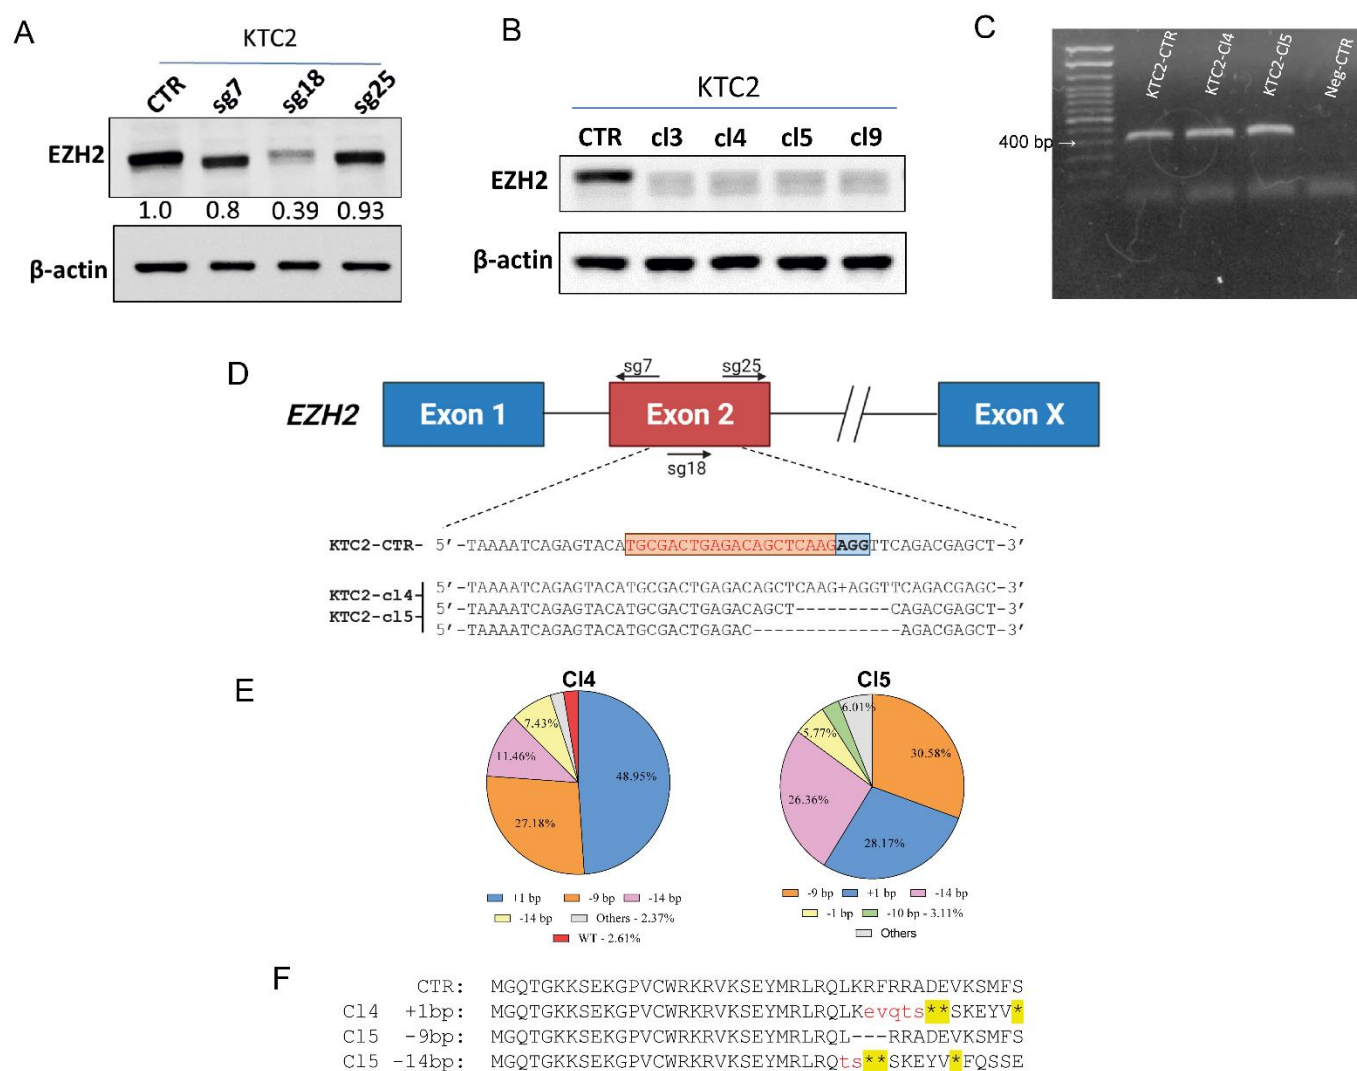

**Figure S1.** Targeting the *EZH2* gene with CRISPR/Cas9 in the KTC2 cell line. **(A)** EZH2 protein levels in the mixed populations of KTC2 transfected with different sgRNAs. **(B)** EZH2 protein levels in the clones derived from KTC2 sg18 (cl3, cl4, cl5 and cl9) **(C)** PCR amplification of sgRNA target region. We loaded in the 1.5% agarose gel the 100bp ladder (Invitrogen) followed by 5μL of a 25μL PCR (using 150 ng of genomic DNA of each clone). **(D)** Genomic DNA sequencing of KTC2 clones C14 and C15 after CRISPR/Cas9-mediated *EZH2* gene editing. sgRNA-guided target regions are highlighted in red and PAM sequence in bold. The main editing events after dsDNA repair resulted in +1 nt insertion in clone 4 (cl4) and 9 nt or 14 nt deletion in clone 5 (cl5). **(E)** Pie chart showing the main gene editing events in cl4 and cl4 after analysis in SeqScreener App. **(F)** Alignment of amino acids changes after gene editing (nonsense and missense) in cl4 and cl5. Sg: single guide; CTR: control; cl: clone; PAM: protospacer adjacent motif; \*: premature stop codon.

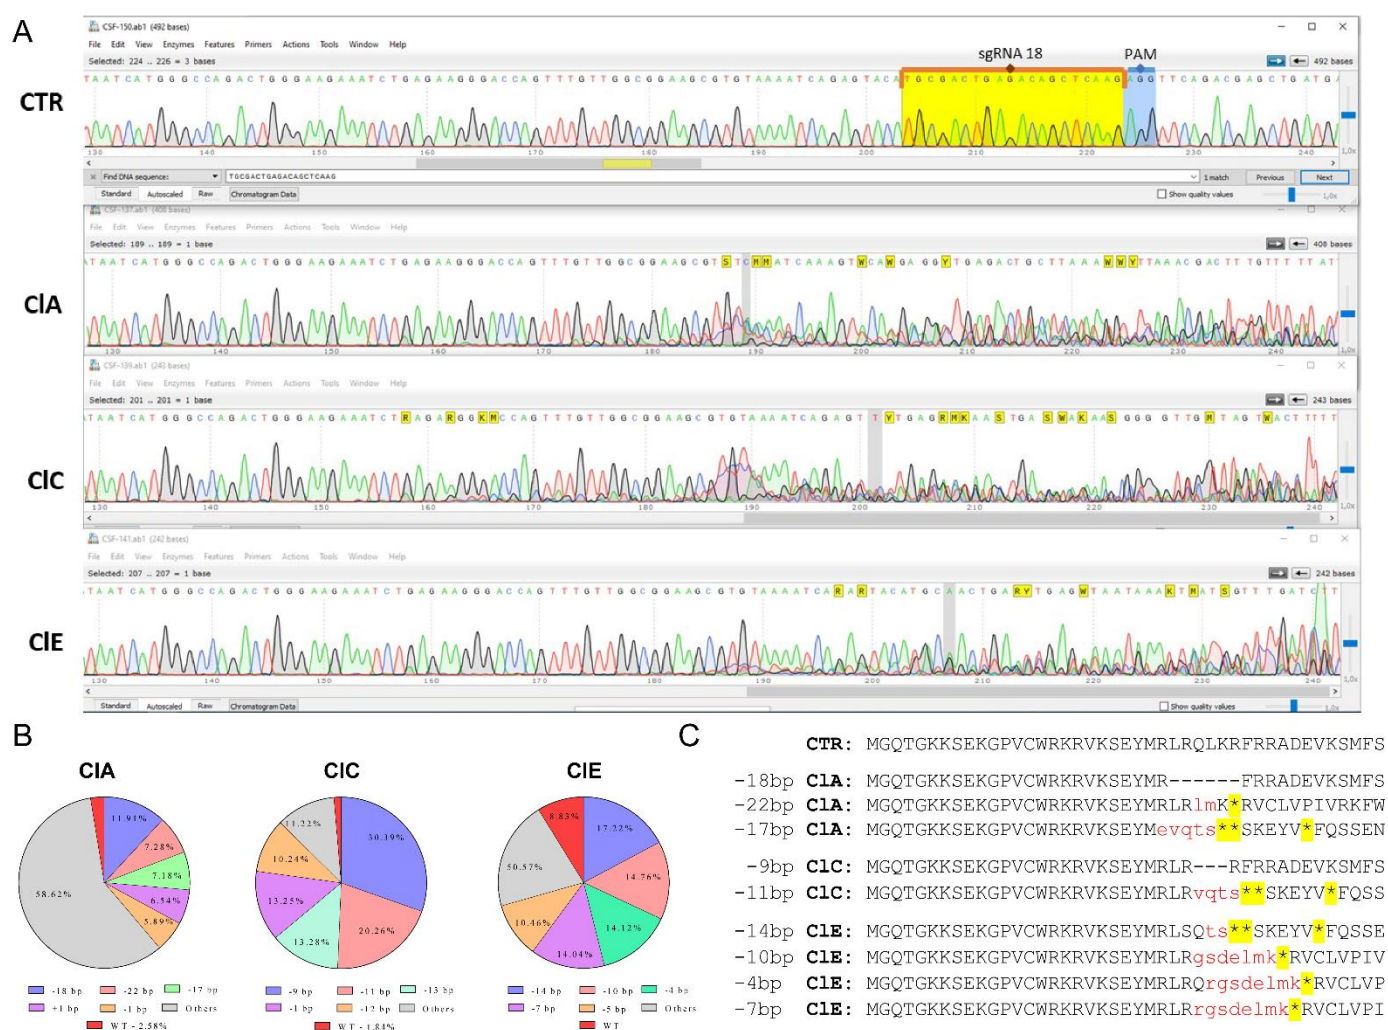

**Figure S2.** Raw sanger sequencing data alignment for *EZH2* gene in control unedited cells (SW1736 CTR) compared to clones A, C and E. The yellow highlighted region in SW1736-CTR indicates the region targeted by sgRNA18 and PAM sequences are highlighted in blue. R: A or G; Y: C or T; S: C or G; W: A or T; K: G or T; M: A or C. **(B).** Pie chart showing the main gene editing events and their respective frequencies in CIA, CIC and CIE cells after analysis in SeqScreener App. **(C).** Alignment of amino acids changes after gene editing (nonsense and missense) in CIA, CIC and CIE. Sg: single guide; CTR: control; cl: clone; PAM: protospacer adjacent motif; \*: premature stop codon.

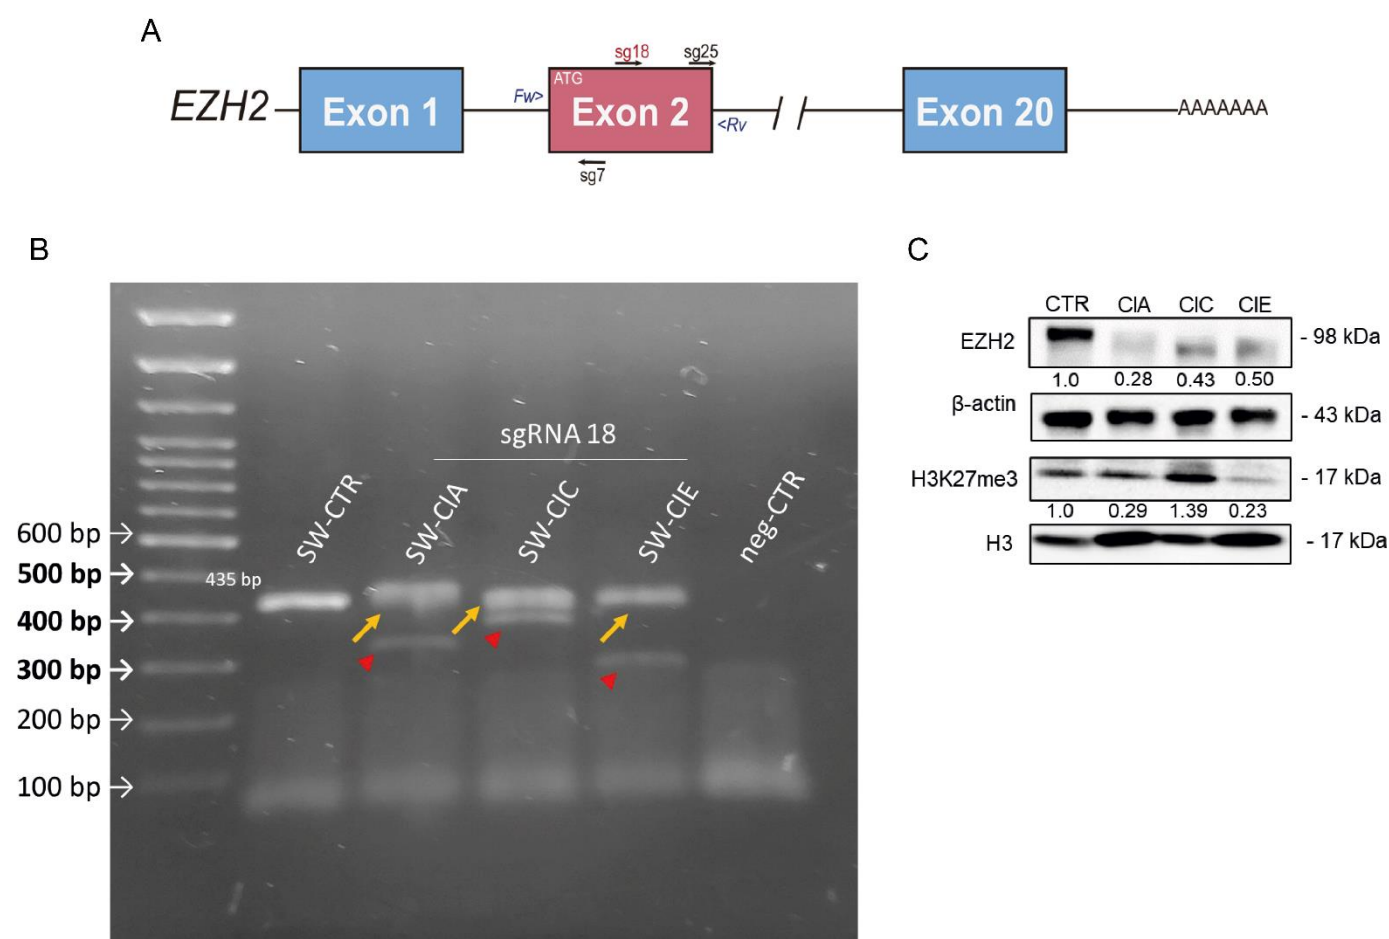

**Figure S3.** PCR amplification of CRISPR/Cas9-sg18 target region in SW-clones A, C and E using primers flanking *EZH2* exon 2 (**A**). In the control unedited SW1736, the presence of a single band of 435 bp is expected, while, in the edited clones, we observe different smaller fragments indicating deletions in the agarose gel (**B**). We loaded in the 1.5% agarose gel the 100bp ladder (Invitrogen) followed by 5uL of a 25uL PCR (using 150 ng of genomic DNA of each clone). In **C**, we show again the protein levels of EZH2 in the clones.



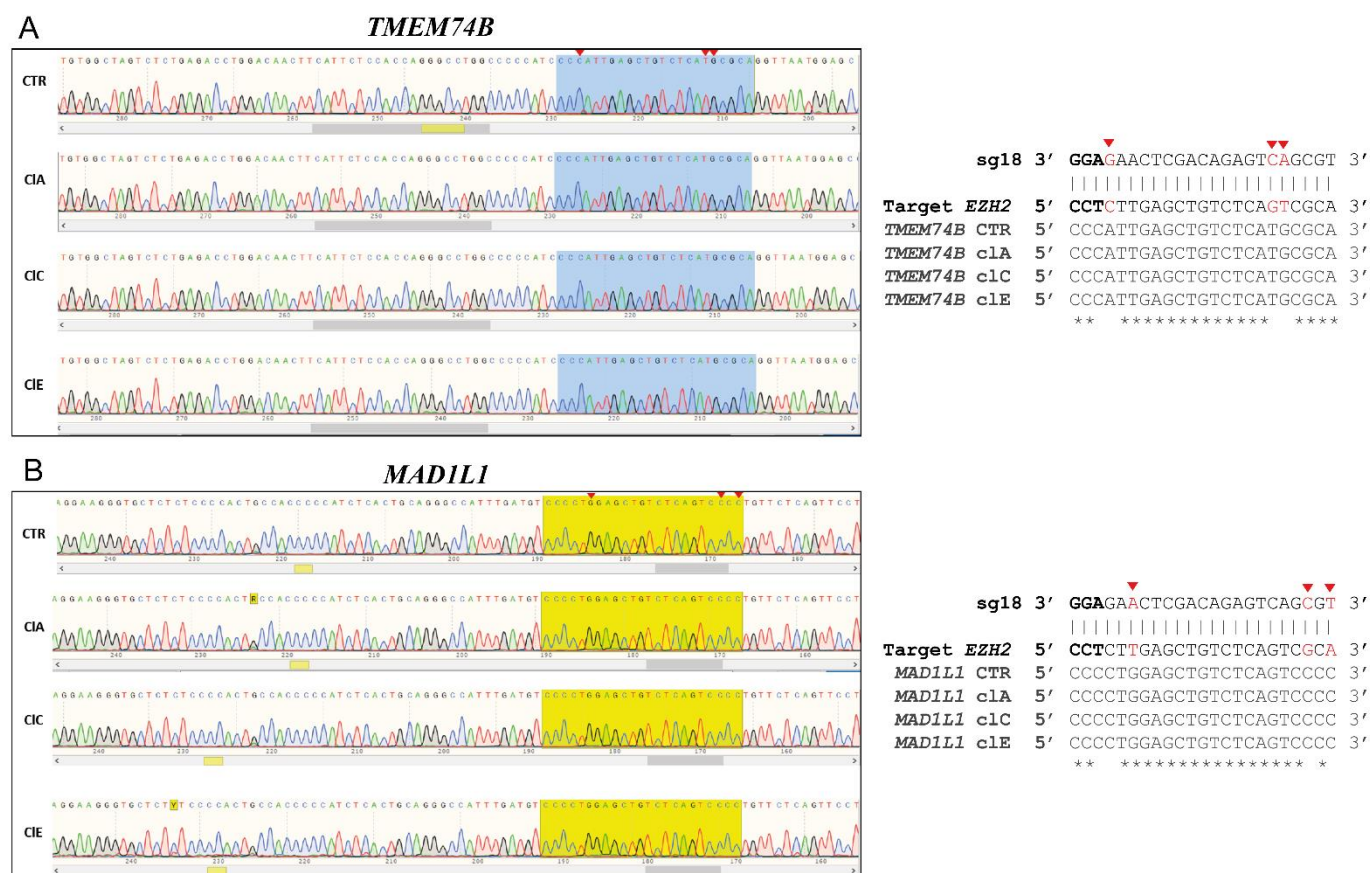

**Figure S4.** Raw sanger sequencing data alignment for *TMEM74B* and *MAD1L1* genes, predicted off-target coding-genes in the ChopChop algorithm. **(A)** The left panel shows the alignment of samples electropherogram and red arrowhead indicates potential off-target site of sgRNA18 in *TMEM74B* gene. Highlighted in blue, we indicate the potential target of sg18. In the left panel, we aligned sequences of SW1736-CTR and SW1736-edited cells showing no off-targeting in *TMEM74B* gene. **(B)** The left panel shows the alignment of samples electropherogram and red arrowhead indicates potential off-target site of sgRNA18 in *MAD1L1* gene. Highlighted in yellow, we indicate the potential target of sg18. In the left panel, we aligned sequences of SW1736-CTR and SW1736-edited cells showing no off-targeting in *MAD1L1* gene.



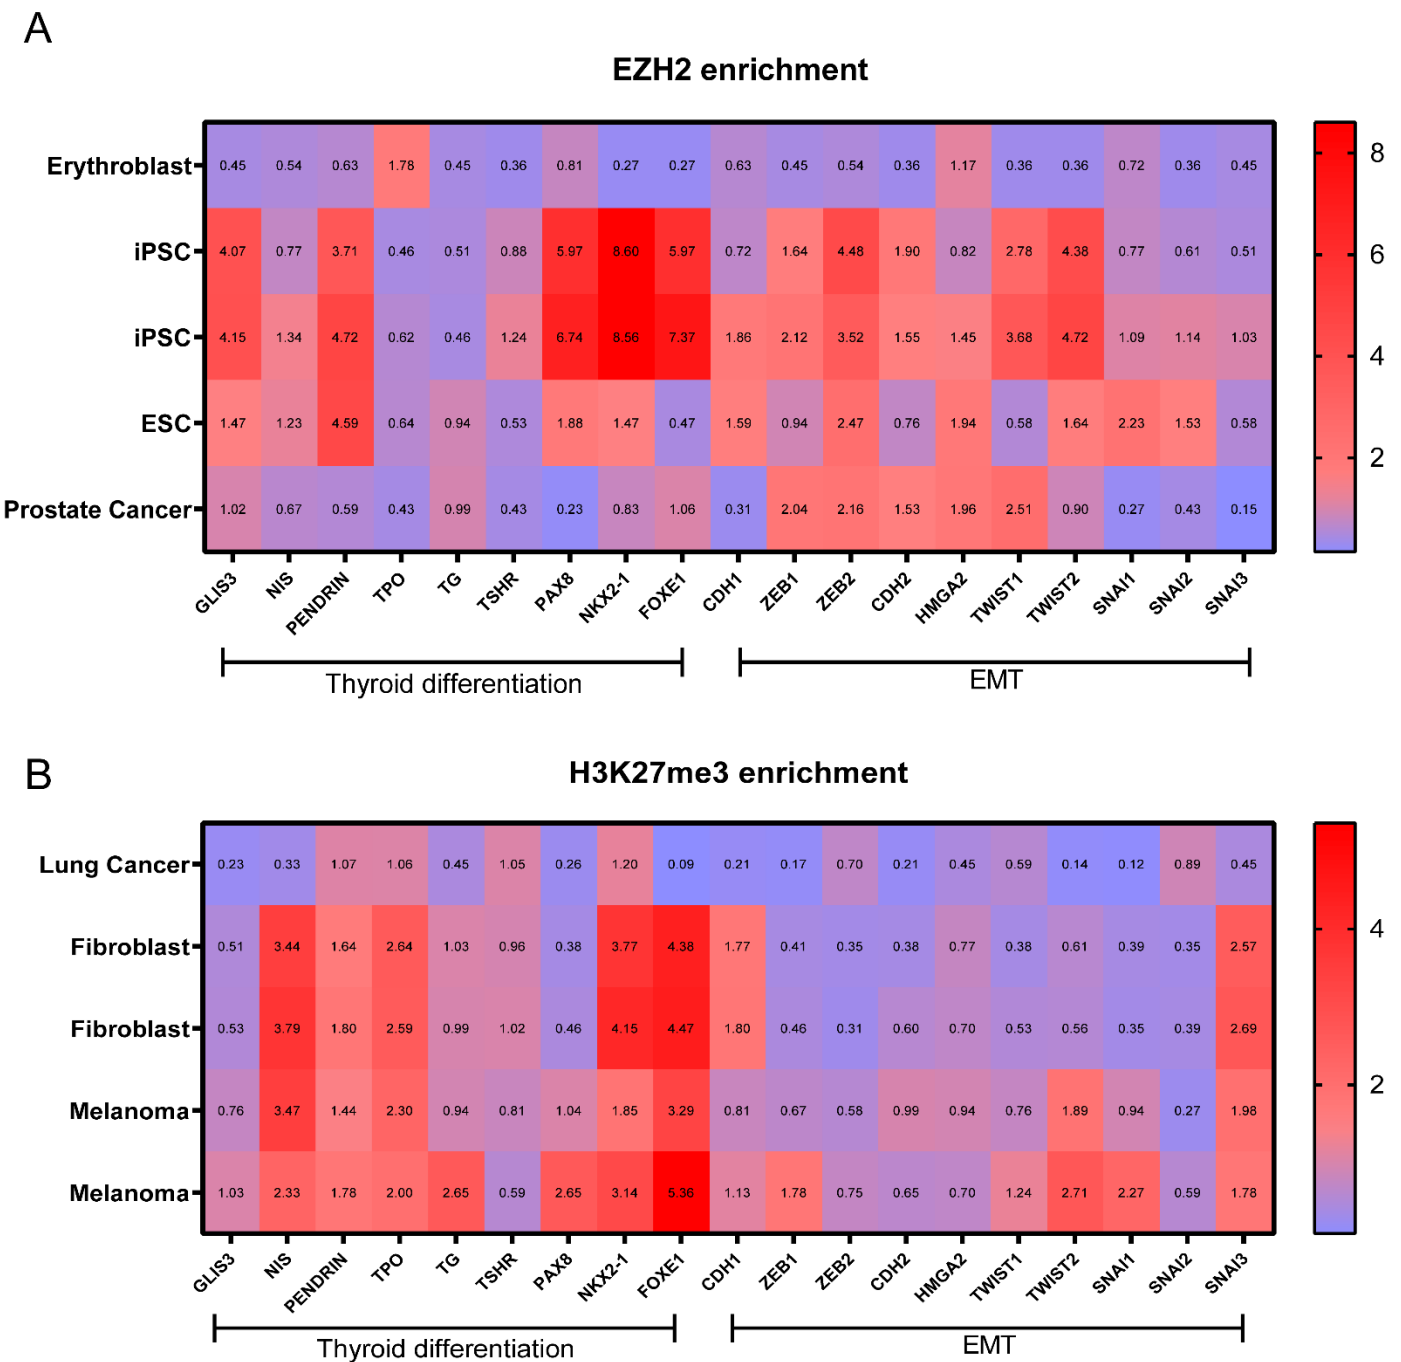

**Figure S5.** Cistrome data browser analysis of EZH2 (A) and H3K27me3 (B) binding at thyroid differentiation, EMT and Wnt signaling genes. For EZH2 binding data, the following Cistrome ID studies were utilized: 74684 (Erythroblast), 41794 (iPSC), 41788 (iPSC), 9009 (ESC) and 8664 (Prostate Cancer). For H3K27me3 binding data, the following Cistrome ID studies were utilized: 45141 (Lung Cancer), 71329 (Fibroblast), 71328 (Fibroblast), 52394 (Melanoma), 52389 (Melanoma).

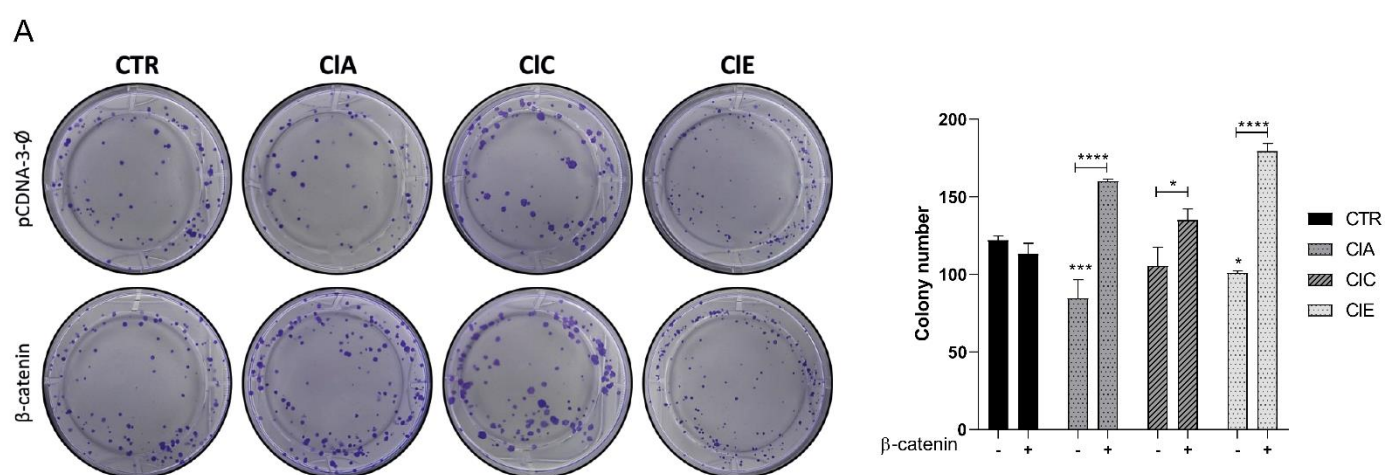

**Figure S6.**  $\beta$ -catenin rescue assay.  $\beta$ -catenin was transiently overexpressed in SW1736-CTR and SW1736-CIA, SW1736-CIC and SW1736-CIE cells. **(A)** Colony formation assay and quantification of number of colonies in cells transfected with an empty pCDNA (-) or with  $\beta$ -catenin (+). \*,  $p < 0.05$ ; \*\*\*,  $p < 0.001$ ; \*\*\*\*,  $p < 0.0001$  vs SW1736-CTR or pCDNA (-) cells.
